# Supplementary material for: Early restoration of parvalbumin interneuron activity prevents memory loss and network hyperexcitability in a mouse model of Alzheimer’s disease
Source: PubMed Central journal article supplement (PMC7714697; doi:10.1038/s41380-019-0483-4), 2019-08-20
Supplement: 41380_2019_483_MOESM1_ESM.pdf [file 41380_2019_483_MOESM1_ESM.pdf]

**Early restoration of parvalbumin interneuron activity prevents memory loss  
and network hyperexcitability in a mouse model of Alzheimer's disease**

Sara Hijazi, Tim S Heistek, Philip Scheltens, Ulf Neumann, Derya R. Shimshek, Huibert D  
Mansvelder, August B Smit & Ronald E van Kesteren

**SUPPLEMENTARY FIGURES 1-10**

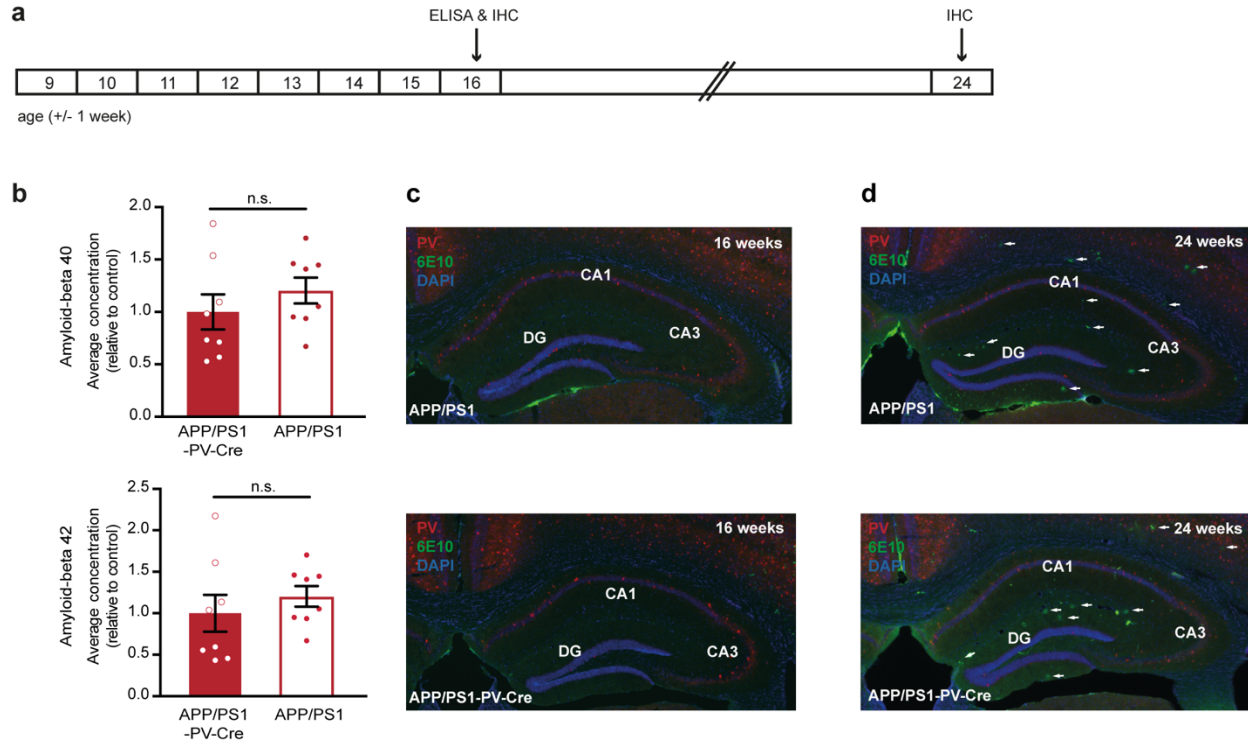

**Supplementary Figure 1. Amyloid state in young APP/PS1 and APP/PS1-PV-Cre mice.** (a) APP/PS1 and APP/PS1-PV-Cre mice were sacrificed at 16 and 24 weeks of age to measure A $\beta$  levels using enzyme-linked immunosorbent assay (ELISA) and immunohistochemistry (IHC). (b) Relative A $\beta_{1-40}$  (upper panel) and A $\beta_{1-42}$  (lower panel) levels in the hippocampus of 16 weeks-old APP/PS1-PV-Cre and APP/PS1 mice (Student's t-test;  $n = 8$  mice per group;  $p = 0.344$  and  $p = 0.550$ , respectively). (c) Representative images of 6E10 (green) and PV immunostaining (red) in the CA1 region of APP/PS1 (upper panel) and APP/PS1-PV-Cre (lower panel) mice at 16 weeks of age indicating absence of amyloid plaques. (d) Representative images of 6E10 (green) and PV immunostaining (red) in the CA1 region of APP/PS1 (upper panel) and APP/PS1-PV-Cre (lower panel) mice at 24 weeks of age showing aggregation of amyloid plaques (indicated with white arrows).

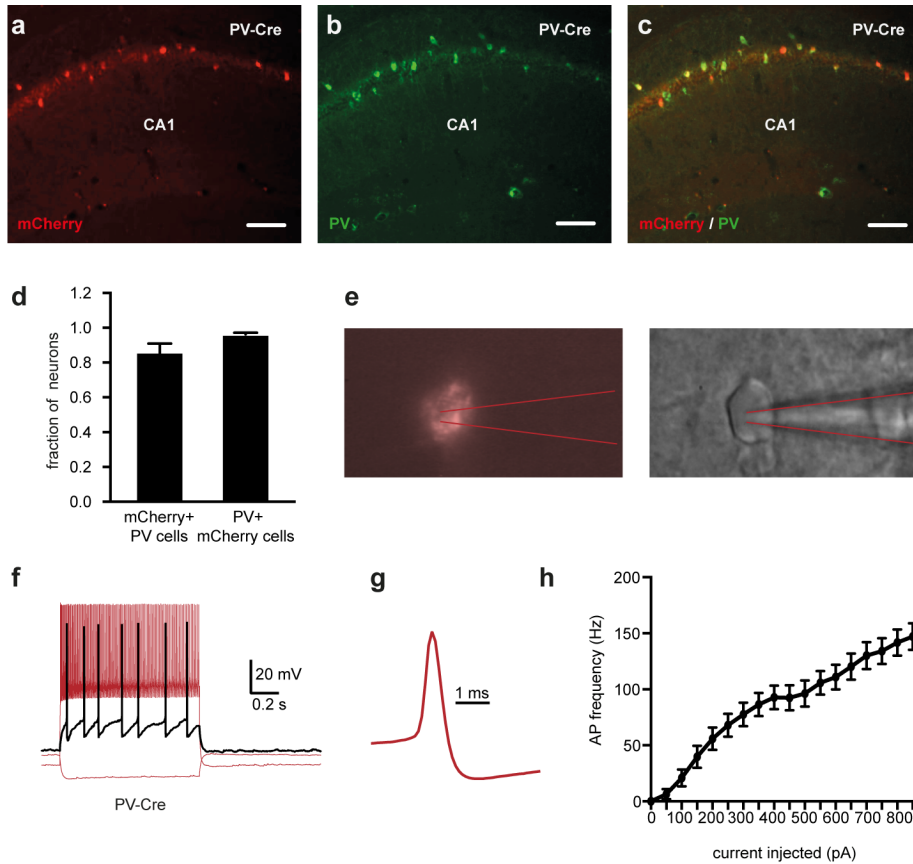

**Supplementary Figure 2. Correct targeting of PV-expressing interneurons in the CA1 region of the hippocampus of PV-Cre mice.** Representative images of (a) mCherry expression (red) and (b) PV immunostaining (green) in the CA1 region of PV-Cre mice. (c) Overlay of mCherry and PV staining indicating that mCherry expression is restricted to PV neurons. Scale bars: 100  $\mu$ m. (d) Bar graphs showing the percentage of PV-positive cells expressing mCherry and of the percentage of mCherry-positive cells expressing PV ( $n = 20$  sections from 4 mice). (e) mCherry-labeled PV interneuron in the CA1 region of the hippocampus (left panel) and live contrast image of the same neuron with the patch pipette attached (right panel). (f) Voltage responses to 1 s hyperpolarizing or depolarizing current steps from a PV-expressing interneuron in a WT-PV-Cre mouse. (g) Average action potential (AP) waveforms of the first AP from a representative cell with a characteristic narrow AP half-width. (h) Average AP frequency in response to 0-850 pA depolarizing current steps illustrating the fast-spiking profile of PV-expressing interneurons ( $n = 9$  cells from 3 mice).

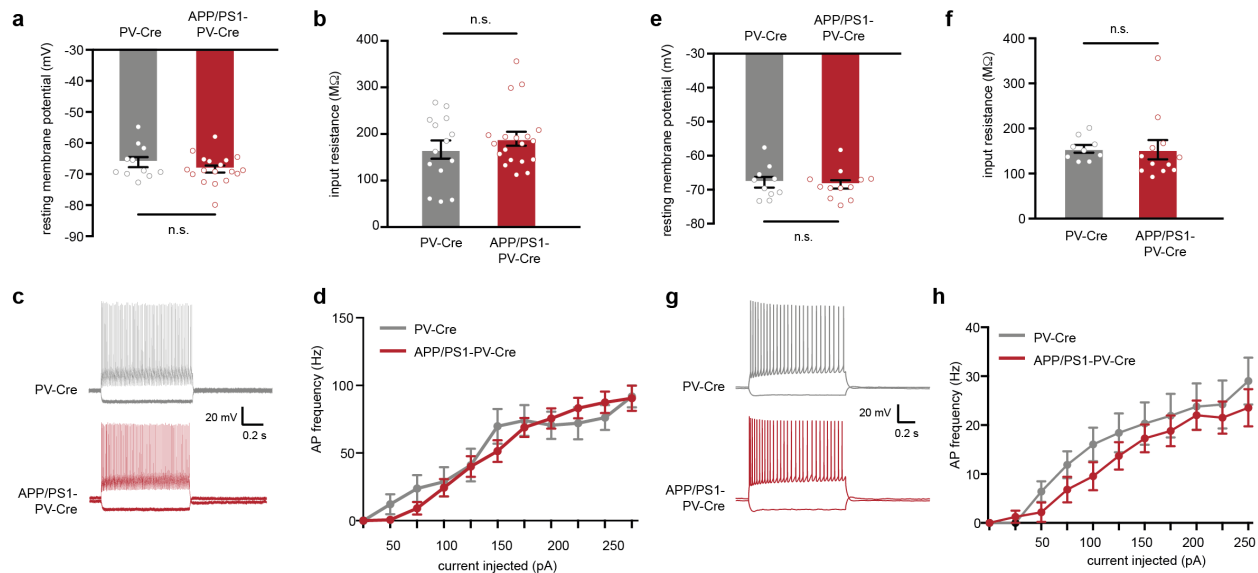

**Supplementary Figure 3. Membrane and action potential firing properties of hippocampal PV interneurons and pyramidal neurons are unaffected in APP/PS1 mice at 7 to 9 weeks of age.** (a) PV neuron resting membrane potential and (b) input resistance were unaffected in APP/PS1-PV-Cre mice at 7 to 9 weeks of age compared with PV-Cre wildtype controls (Student's t-test:  $n = 13/17$  cells from 4 mice per group;  $p = 0.329$  and  $p = 0.344$ ). (c) Voltage responses to 1 s hyperpolarizing or depolarizing current steps from a PV neuron in a PV-Cre wildtype mouse (grey) or an APP/PS1-PV-Cre mouse (red). (d) Average action potential (AP) frequency in response to 0-250 pA depolarizing current steps showing no changes in PV neuron excitability in APP/PS1-PV-Cre mice compared with PV-Cre wildtype controls (*genotype*  $\times$  *current* two-way repeated measures ANOVA:  $n = 13/17$  cells from 4 mice per group,  $F_{5,140} = 0.85$ ,  $p = 0.514$ ). (e) Pyramidal neuron resting membrane potential and (f) input resistance were unaffected in APP/PS1-PV-Cre mice at 7-9 weeks of age compared with PV-Cre wildtype controls (Student's t-test:  $n = 10/12$  cells from 3 mice per group;  $p = 0.755$  and  $p = 0.935$ ). (g) Voltage responses to 1 s hyperpolarizing or depolarizing current steps from a pyramidal neuron in a PV-Cre wildtype mouse (grey) or an APP/PS1-PV-Cre mouse (red). (h) Average action potential (AP) frequency in response to 0-250 pA depolarizing current steps showing no changes in pyramidal neuron excitability in APP/PS1-PV-Cre mice compared with PV-Cre wildtype controls (*genotype*  $\times$  *current* two-way repeated measures ANOVA:  $n = 10/12$  cells from 3 mice per group,  $F_{10,110} = 0.60$ ,  $p = 0.811$ ).

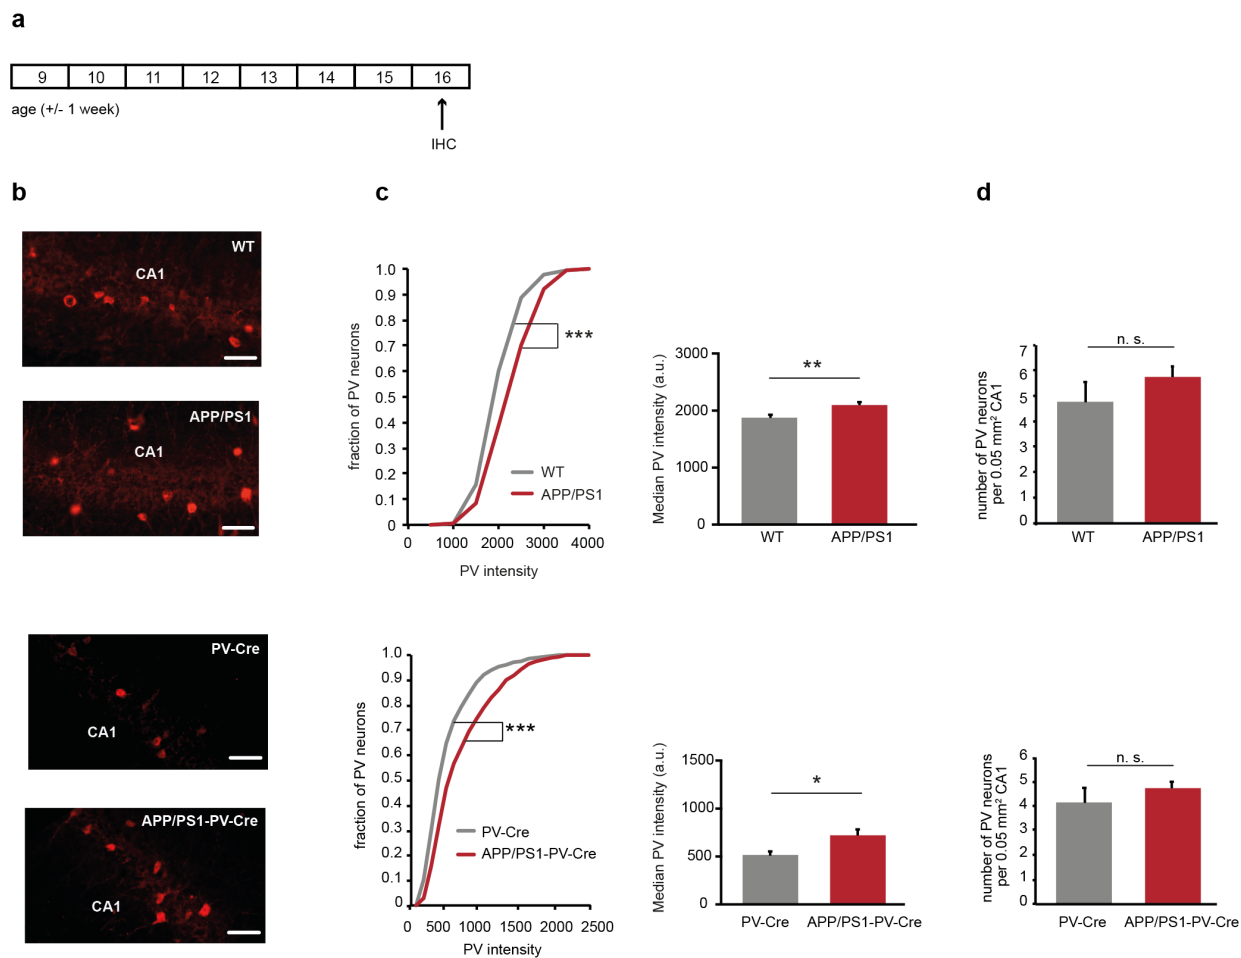

**Supplementary Figure 4. PV interneurons show increased PV immunoreactivity in APP/PS1 mice at 15-17 weeks of age.** (a) APP/PS1 and APP/PS1-PV-Cre mice were perfused at 15-17 weeks of age for immunohistochemical (IHC) analysis. (b) PV neurons were visualized in coronal sections of the hippocampus of APP/PS1 (upper panel) and APP/PS1-PV-Cre (lower panel) mice and their respective wildtype (WT) and PV-Cre controls at 15-17 weeks of age using anti-PV staining (red). PV intensities per neuron were quantified in high magnification images of the CA1 area only. CA, cornus ammonis. Scale bars: 40  $\mu$ m. (c) Cumulative frequency distribution of PV intensities of all cells measured shows an overall increase in PV intensities in APP/PS1 (upper panel) and APP/PS1-PV-Cre (lower panel) mice compared with WT and PV-Cre controls (Kolmogorov-Smirnov Z test:  $n = 1042/1130$  cells from 16 sections from 4 mice per genotype for APP/PS1 vs WT;  $n = 1516/1558$  cells from 16 sections from 4 mice per genotype for APP/PS1-PV-Cre vs WT-PV-Cre,  $***p < 0.001$ ). (d) Median PV intensity of all cells measured shows a significant increase in APP/PS1 (upper panel) and APP/PS1-PV-Cre (lower panel) mice compared with WT and PV-Cre controls (Mann-Whitney test:  $n = 16$  sections from 4 mice per genotype,  $*p < 0.05$  and  $**p < 0.01$ ). (e) Quantification of PV-positive cells in the CA1 area confirmed that the total number of PV-positive cells is unaltered between genotypes (Student's t test:  $n = 4$  mice per genotype for APP/PS1 vs WT,  $p = 0.420$ ;  $n = 4$  mice per genotype for APP/PS1-PV-Cre vs PV-Cre,  $p = 0.275$ ).

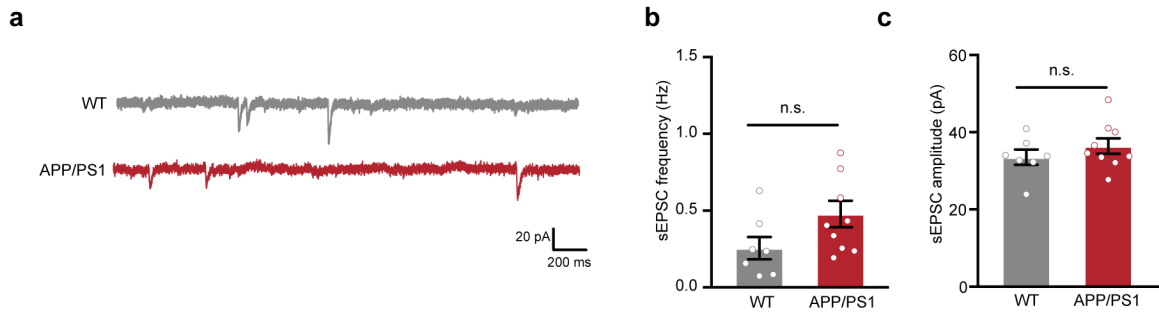

**Supplementary Figure 5. Excitatory transmission onto pyramidal neurons is unaltered in APP/PS1 mice at 15-17 weeks of age.** (a) Example traces of spontaneous excitatory postsynaptic currents (sEPSC) recorded from hippocampal pyramidal neurons in APP/PS1 mice (red) and WT controls (grey) at 15-17 weeks of age. (a-c) No significant alterations were observed in the frequency (b) or in the amplitude (c) of sEPSCs in APP/PS1 mice compared with WT controls (Mann-Whitney test:  $n = 7/9$  cells from 3 mice per genotype,  $p = 0.12$ ).

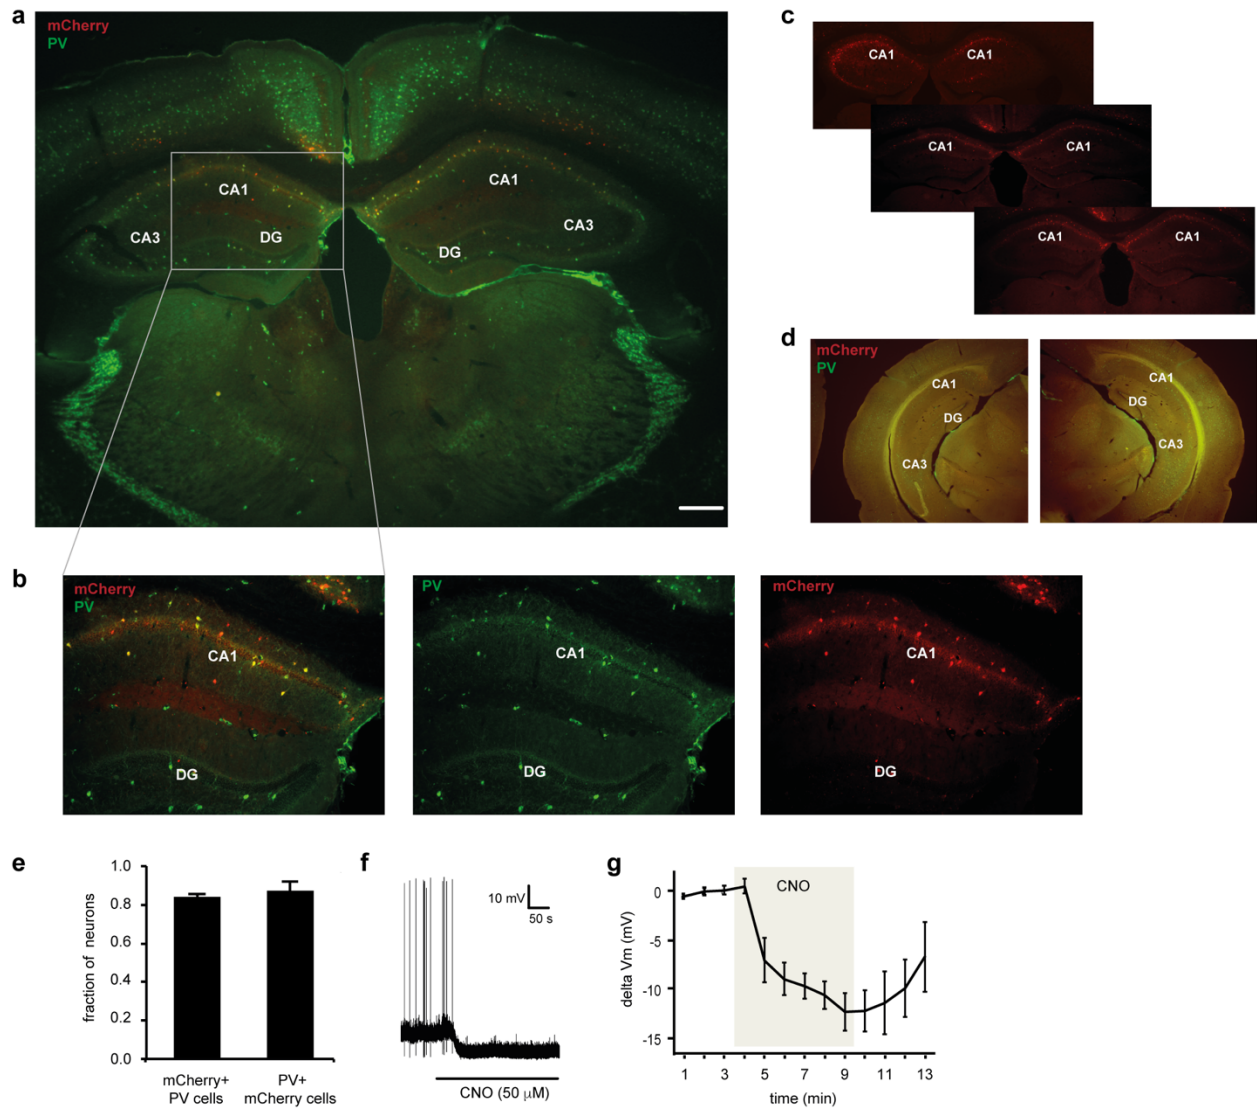

**Supplementary Figure 6. Characterization of DREADD expression and function in the brain.** (a) Representative overview composite image of mCherry expression (red) and PV immunostaining (green) in a coronal slice of a PV-Cre mouse; scale bar: 200  $\mu$ m. (b) Detailed images of the CA1 region of the hippocampus in higher magnification; scale bars: 75  $\mu$ m. (c) Sections covering the dorsal hippocampus, from -1.0 mm to -3.0 mm relative to bregma, showing that DREADD expression is restricted to the CA1 region. (d) Sections covering the ventral hippocampus showing absence of DREADD expression in this region. (e) Bar graphs showing the percentage of PV-positive cells expressing the hM4Di receptor and of the percentage of hM4Di-mCherry-positive cells expressing PV ( $n = 18$  sections from 4 mice). (f) Representative voltage trace of 50  $\mu$ M CNO-induced hyperpolarization in an hM4Di-positive neuron. (g) Average membrane potential of hM4Di-positive cells before and after CNO application ( $n = 7$  cells from 2 mice).

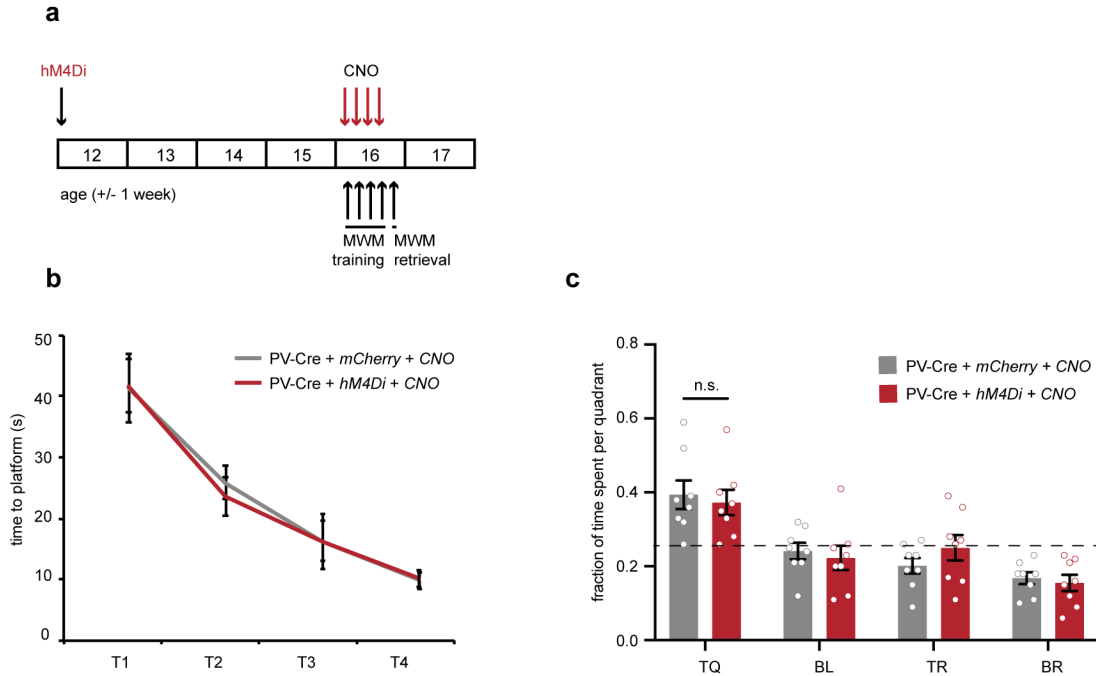

**Supplementary Figure 7. Acute chemogenetic inhibition of hippocampal PV neurons does not affect spatial memory in wildtype mice.** (a) WT-PV-Cre mice were injected with hM4Di virus at 11-13 weeks of age and tested in a MWM test four weeks later. CNO (5 mg/kg) or saline were i.p. injected 30 min prior to each training session. (b) WT-PV-Cre mice that expressed hM4Di and had received CNO injections showed no difference in learning compared with mCherry-expressing PV-Cre mice (*group x training* two-way repeated measures ANOVA:  $n = 8$  mice per group,  $F_{3,21} = 0.22$ ,  $p = 0.880$ ). (c) During the one-minute probe trial, CNO-treated WT-PV-Cre mice expressing hM4Di spent an equal amount of time in the target quadrant (TQ) compared with WT-PV-Cre mice expressing mCherry (two-way ANOVA:  $n = 8$  mice per group,  $F_{3,21} = 4.33$ ,  $p = 0.731$ ). Compared with chance level (dashed line), both hM4Di- and mCherry-expressing mice spent significantly more time in the target quadrant, confirming that the absence of memory impairments in both groups (Student's t-test;  $p < 0.01$ ).



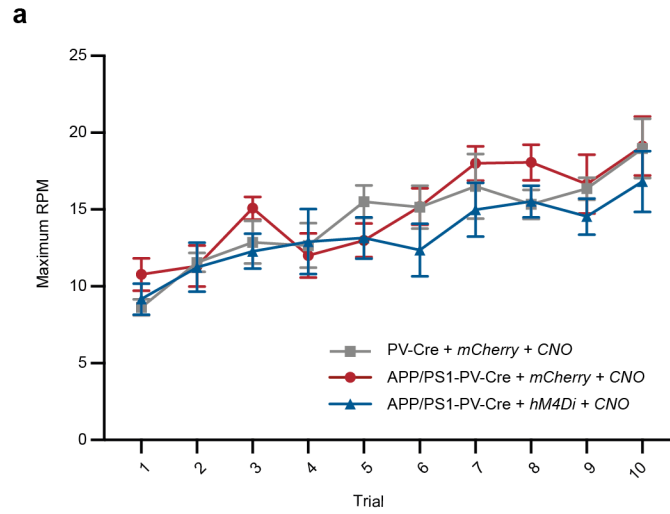

**Supplementary Figure 8. Chemogenetic inhibition of hippocampal PV neurons does not affect locomotor behavior.** (a) CNO-treated APP/PS1-PV-Cre mice expressing hM4Di, WT-PV-Cre mice expressing mCherry and APP/PS1-PV-Cre mice expressing mCherry show no differences in motor skills in a rotarod test (*group x trial* two-way repeated measures ANOVA:  $n = 7$  mice per group type,  $F_{2,18} = 0.8631$ ,  $p = 0.439$ ).

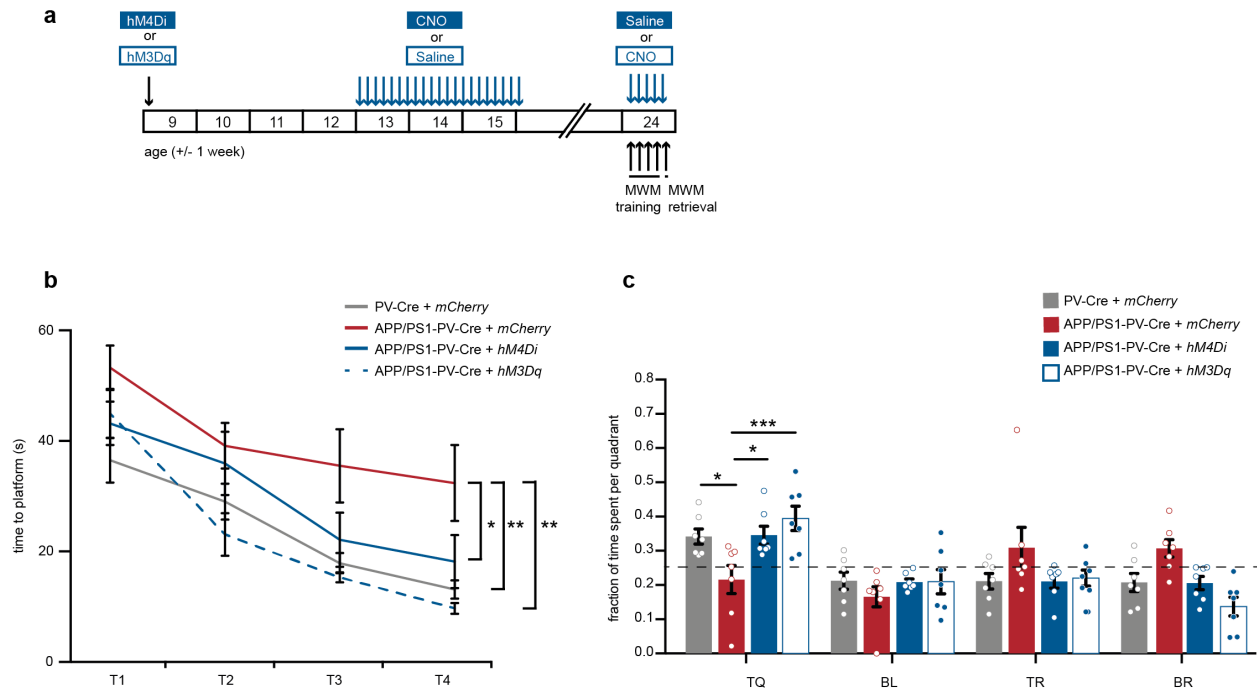

**Supplementary Figure 9. Chemogenetic activation of hippocampal PV neurons rescues spatial memory deficits in APP/PS1 mice at 23-25 weeks of age, similar to chemogenetic inhibition at 13-15 weeks of age.** (a) Animals were injected with either hM4Di or hM3Dq virus at 8-10 weeks of age. After 4 weeks, CNO (3 mg/kg) was i.p. injected daily for a period of 3 weeks in hM4Di-expressing APP/PS1-PVCre, mCherry-expressing WT-PV-Cre and mCherry-expressing APP/PS1-PV-Cre mice; saline was i.p. injected daily for a period of 3 weeks in hM3Dq-expressing APP/PS1-PVCre mice. At weeks 23-25, 30 minutes prior to each MWM session, hM3Dq-expressing APP/PS1-PVCre mice received i.p. injections of CNO (1 mg/kg); all other groups received saline injections. (b) Spatial learning was assessed measuring the time required to find the hidden platform on 4 consecutive training days (T1-4). APP/PS1-PV-Cre mice that expressed hM3Dq and received CNO injections showed significantly improved learning compared with mCherry-expressing APP/PS1-PV-Cre mice that received saline, and were comparable to both hM4Di-expressing APP/PS1-PVCre mice that received CNO injections in week 13-15 and WT-PV-Cre mice that received saline injections (*group x training* two-way repeated measures ANOVA post-hoc LSD test:  $n = 7/7/8/7$  mice per group,  $F_{3,25} = 4.79$ ,  $p = 0.009$ ; post-hoc LSD test:  $*p < 0.05$ ,  $**p < 0.01$ ). (c) During the one-minute probe trial, CNO-treated APP/PS1-PV-Cre mice expressing hM3Dq spent significantly more time in the target quadrant (TQ) compared with saline-treated APP/PS1-PV-Cre mice expressing mCherry, and performed similar to earlier treated hM4Di-expressing APP/PS1-PVCre mice and saline-treated WT-PV-Cre mice (two-way ANOVA:  $n = 7/7/8/7$  mice per group,  $F_{9,54} = 3.56$ ,  $p = 0.001$ ; post-hoc LSD test:  $*p < 0.05$ ,  $***p < 0.001$ ). Compared with chance level (dashed line), CNO-treated APP/PS1-PV-Cre expressing hM3Dq, saline-treated APP/PS1-PV-Cre expressing hM4Di and saline-treated WT-PV-Cre mice spent significantly more time in the target quadrant, while control APP/PS1-PV-Cre control mice did not (Student's *t* test:  $p < 0.05$  for WT-PV-Cre and hM4Di-expressing APP/PS1-PV-Cre mice;  $p < 0.01$  for hM3Dq-expressing APP/PS1-PV-Cre).

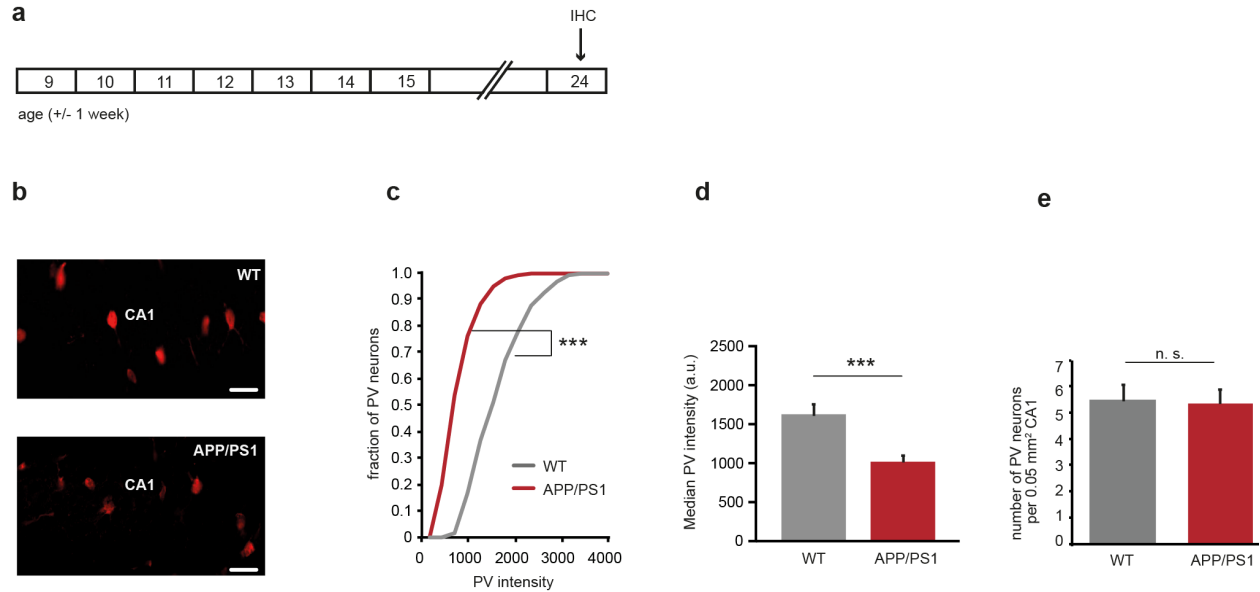

**Supplementary Figure 10. PV interneurons show decreased PV immunoreactivity in APP/PS1 mice at 23-25 weeks of age.** (a) APP/PS1 mice were perfused at 23-25 weeks of age for immunohistochemical (IHC) analysis. (b) PV neurons were visualized in coronal sections of the hippocampus of APP/PS1 mice and wildtype (WT) controls using anti-PV staining (red). PV intensities per neuron were quantified in high magnification images of the CA1 area only. Scale bars: 40  $\mu$ m. (c) Cumulative frequency distribution of PV intensities of all cells measured shows an overall decrease in PV intensities in APP/PS1 mice compared with WT controls (Kolmogorov-Smirnov Z test:  $n = 1065/1027$  cells from 16 sections from 4 mice per genotype,  $***p < 0.001$ ). (d) Median PV intensity of all cells measured shows a significant decrease in APP/PS1 compared with WT controls (Mann-Whitney test:  $n = 15/16$  sections from 4 mice per genotype,  $***p < 0.01$ ). Quantification of PV-positive cells in the CA1 area confirmed that the total number of PV-positive cells is unaltered between genotypes (Student's  $t$  test:  $n = 4$  mice per genotype for APP/PS1 vs WT,  $p = 0.318$ ).
